# Supplementary material for: Conspiracy Beliefs Are Associated with Lower Knowledge and Higher Anxiety Levels Regarding COVID-19 among Students at the University of Jordan
Source: MDPI journal article supplement (doi:10.3390/ijerph17144915), 2020-07-08

## Supplementary File 2

### Supplementary Figures

**Supplementary Figure 1.** The distribution of the study participants into different Schools at the University of Jordan. IT: King Abdullah II School of Information Technology.

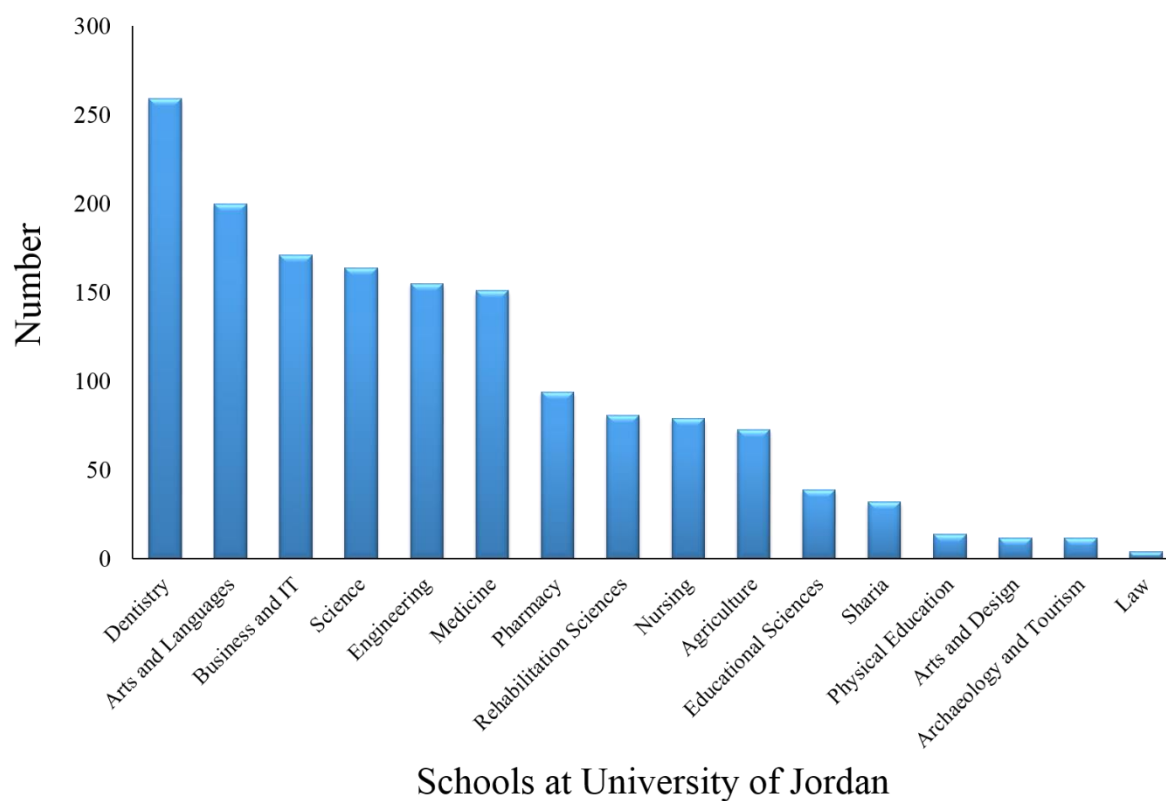

**Supplementary Figure 2.** The anxiety scores of study participants stratified by monthly income of family. K-W: Kruskal Wallis test; JD: Jordanian dinar; anxiety score calculation was based on 7-item Generalized Anxiety Disorder Scale.

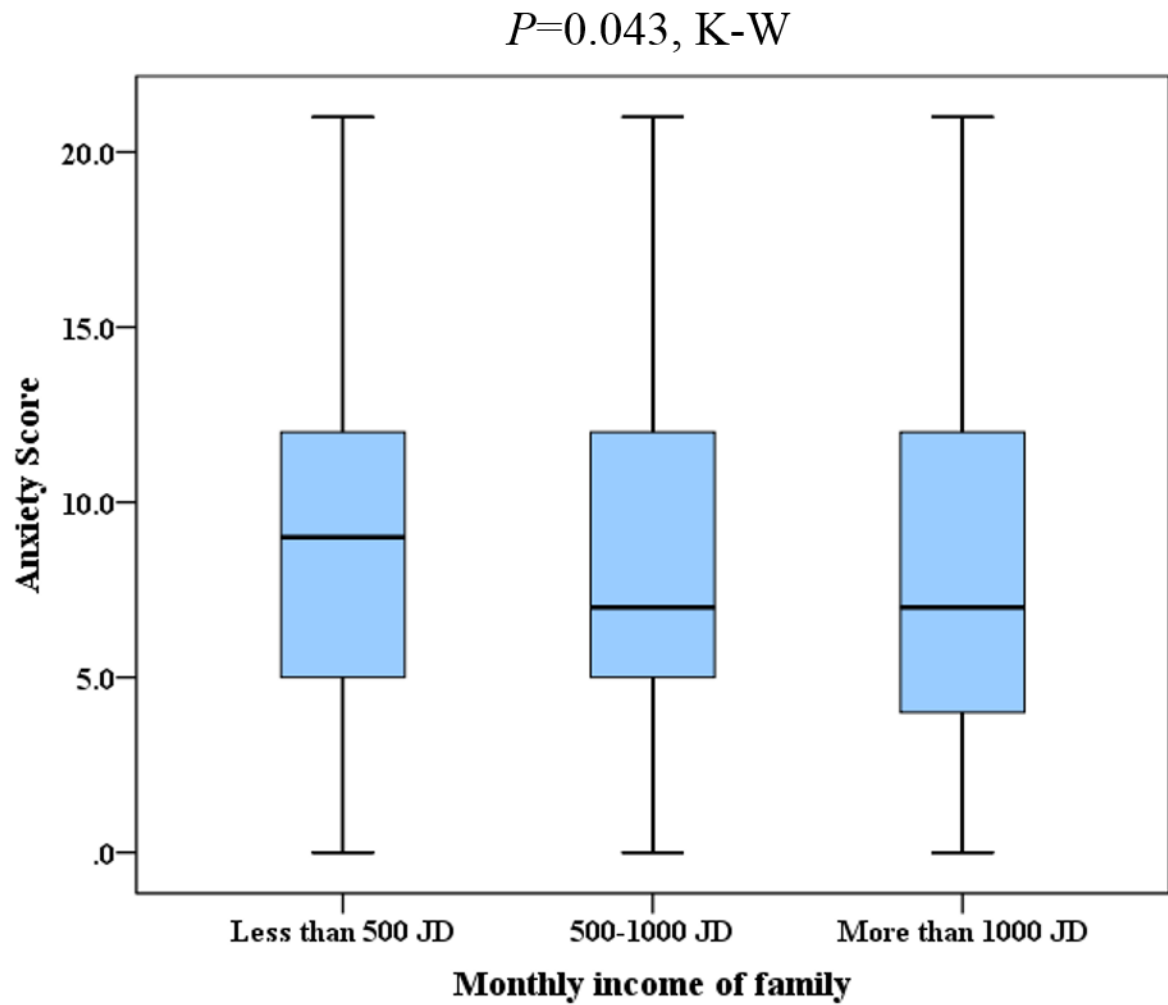

**Supplementary Figure 3.** The anxiety scores of female study participants divided by nationality. M-W: Mann-Whitney U test; anxiety score calculation was based on 7-item Generalized Anxiety Disorder Scale; participants of non-Jordanian origin included 22 different nationalities, with the most common being Palestine (n=42), Iraq (n=33) and Kuwait (n=28).

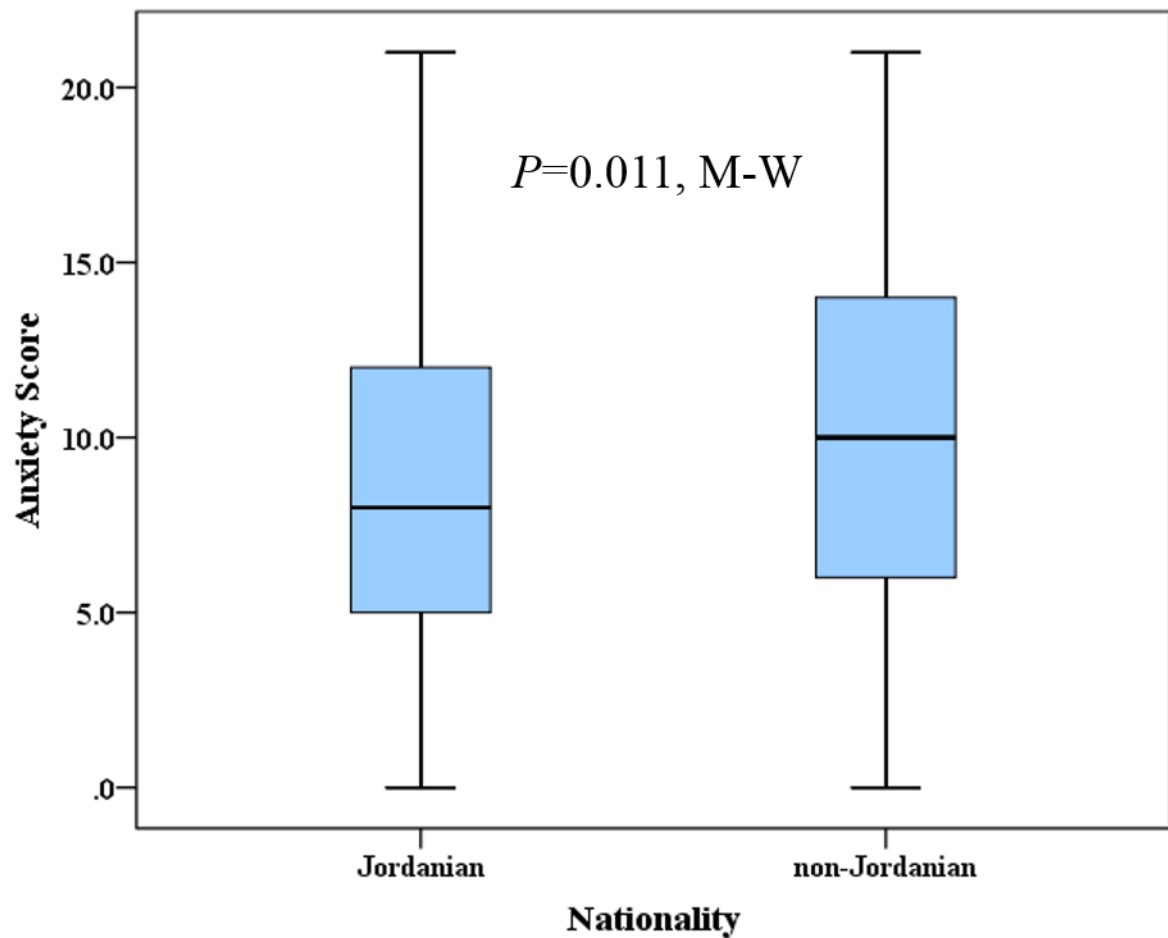

Supplement: s1 [file s1]
